# Supplementary material for: Control of regional decidualization in implantation: Role of FoxM1 downstream of Hoxa10 and cyclin D3
Source: PubMed Central journal article supplement (PMC4563553; doi:10.1038/srep13863), 2015-09-09
Supplement: srep13863-s1.pdf [file srep13863-s1.pdf]

**Control of regional decidualization in implantation: Role of FoxM1 downstream of Hoxa10 and cyclin D3**

**Fei Gao<sup>1,2</sup>, Fenghua Bian<sup>1,2</sup>, Xinghong Ma<sup>1,2,4</sup>, Vladimir V. Kalinichenko<sup>2,3</sup>, and Sanjoy K. Das<sup>1,2\*</sup>**

<sup>1</sup> Division of Reproductive Sciences, Cincinnati Children's Hospital Medical Center, University of Cincinnati College of Medicine, Cincinnati, OH 45229, USA

<sup>2</sup> Perinatal Institute, Cincinnati Children's Hospital Medical Center, University of Cincinnati College of Medicine, Cincinnati, OH 45229, USA

<sup>3</sup> Division of Pulmonary Biology, Cincinnati Children's Hospital Medical Center, University of Cincinnati College of Medicine, Cincinnati, OH 45229, USA

<sup>4</sup> College of Life Science, Northeast Agricultural University, Harbin, China

**A** FoxM1/BrdU/DAPI FoxM1/pHH3/DAPI

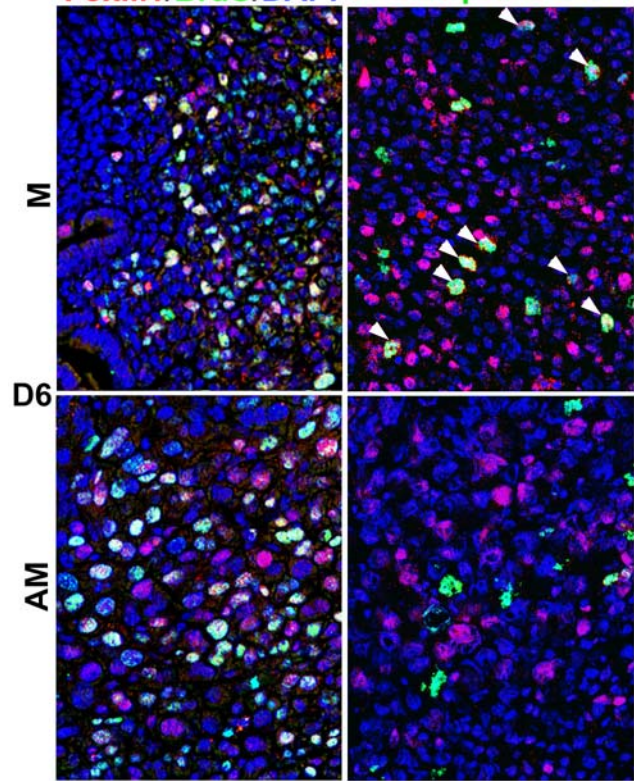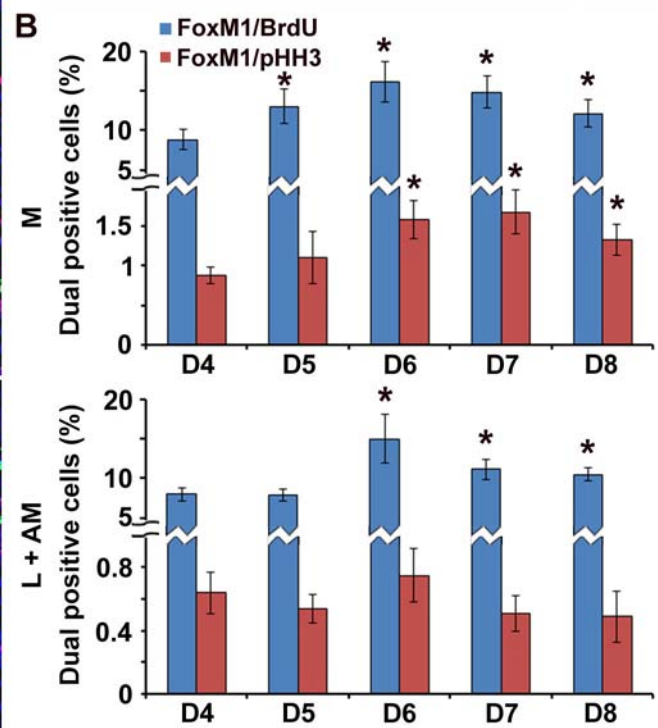

Supplementary Fig. S1

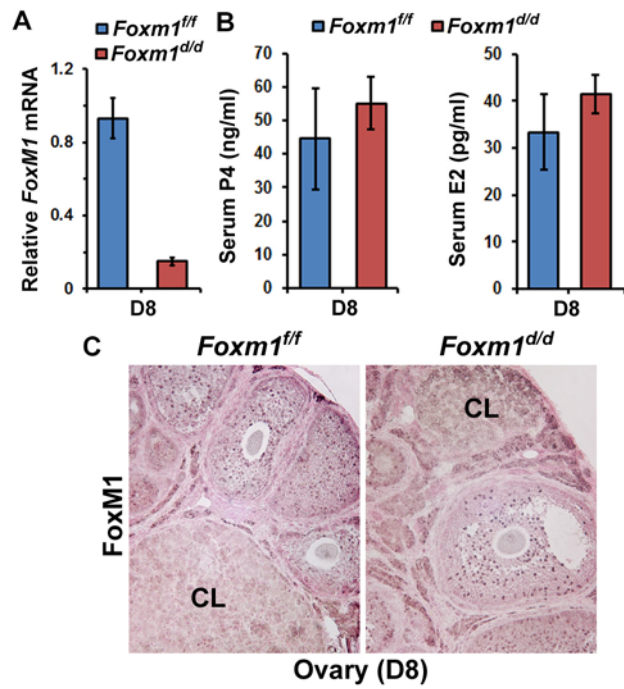

Supplementary Fig. S2

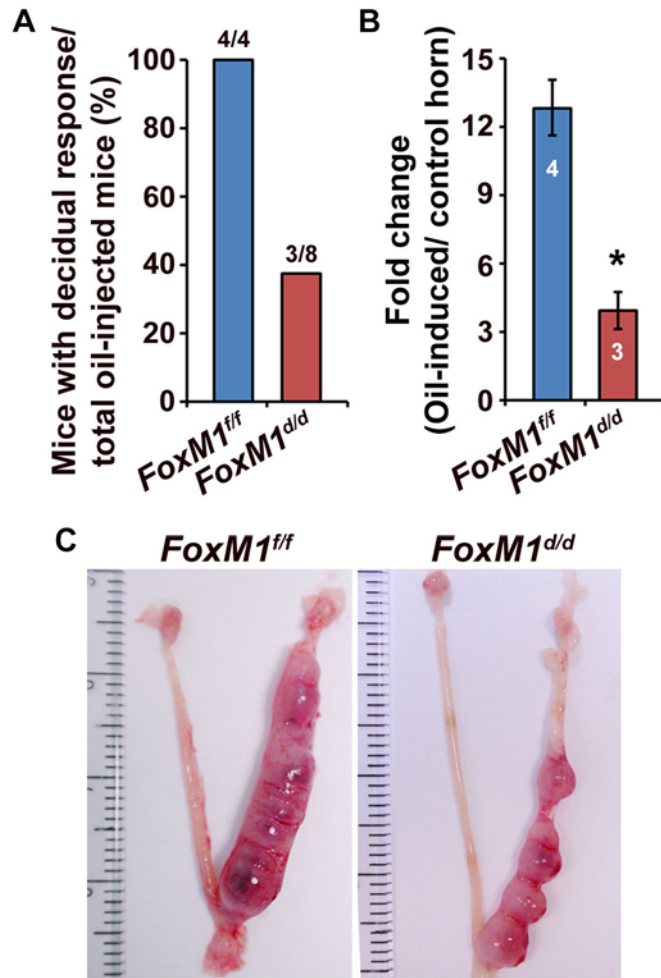

Supplementary Fig. S3

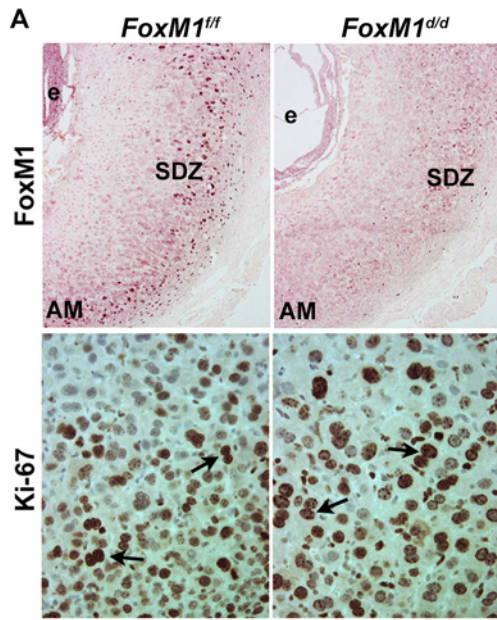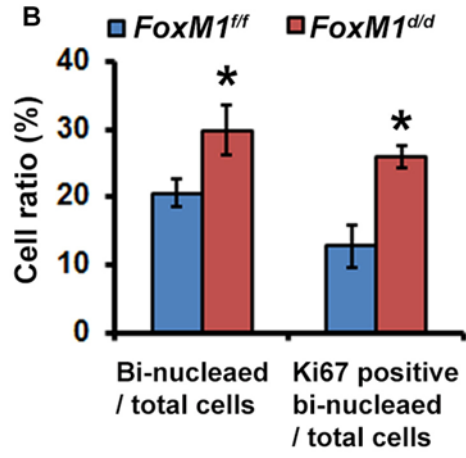

Supplementary Fig. S4

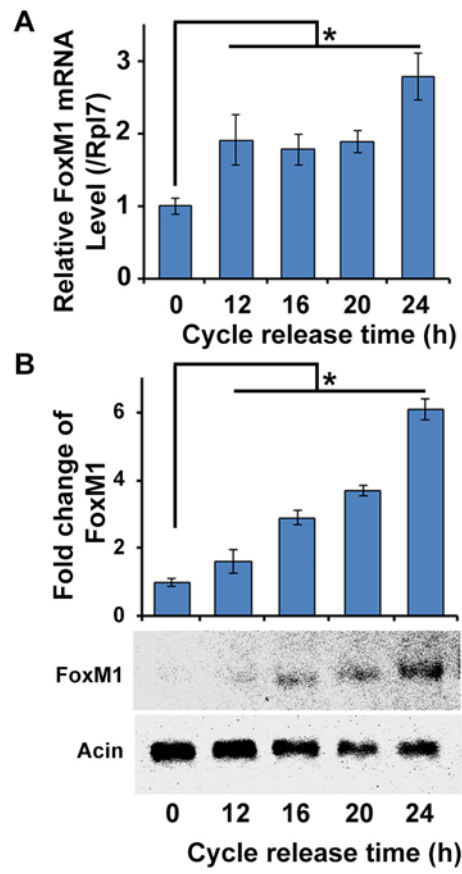

Supplementary Fig. S5

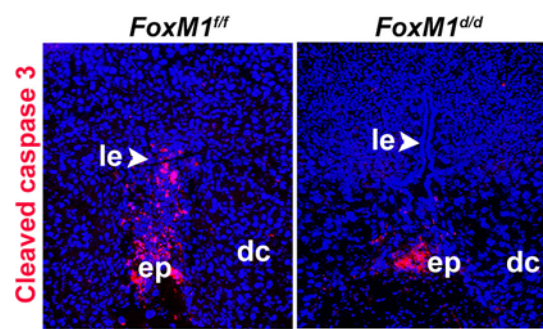

Supplementary Fig. S6

## Supplementary Figure legends

**Supplementary Fig. S1. Immunofluorescence analyses of FoxM1 in peri-implantation uteri in conjunction with cell cycle phase-specific markers.** **A.** Localization of FoxM1 (red) together with BrdU (green) (for S-phase) or pHH3 (green) (for M-phase) is shown for D6 in the left or right columns, respectively. DAPI was used for nuclear staining. Magnifications are at 600X. **B.** Quantitative analyses of dual positive FoxM1/BrdU or FoxM1/pHH3 cells (%) in the M and L+AM locations on D4 and D5-8 IS. \*,  $p < 0.001$ .

**Supplementary Fig. S2. Analyses of uterine *FoxM1* deletion, in conjunction with ovary function, for *FoxM1*<sup>d/d</sup> vs. *FoxM1*<sup>ff</sup> mice.** **A.** Quantitative RT-PCR analysis of *FoxM1* at D8 IS. **B.** Analyses of serum levels of progesterone (P4) and estrogen (E2) on D8. **C.** Immunostaining of FoxM1 in ovaries on D8. CL, corpus luteum.

**Supplementary Fig. S3. The experimental decidualization response between *FoxM1*<sup>d/d</sup> vs. *FoxM1*<sup>ff</sup> mice.** **A.** The outcome of decidualization response after infusion of sesame oil (20  $\mu$ l) intraluminally in one horn on D4 of pseudopregnancy for control and null mice. The contralateral horn served as control. Mice were examined on D8. Numbers above the bars indicate the number of mice with decidual response compared to the total number of mice examined. **B.** Fold increase in uterine weights (infused vs. non-infused) after intraluminal oil infusion and examined on D8. \*,  $p < 0.001$ . **C.** Uterine morphology after induction of decidualization on D8.

**Supplementary Fig. S4. Analysis of bi-nucleation at the IS between *FoxM1*<sup>d/d</sup> vs. *FoxM1*<sup>ff</sup> mice on D8.** **A.** Immunostaining localization of FoxM1 and Ki67. Arrows indicate bi-nucleated cells. **B.** Quantitative analyses of Ki67-positive and hematoxylin-stained bi-nucleated cells in SDZ. \*,  $p < 0.001$ .



**Supplementary Fig. S5. FoxM1 expression both at mRNA (A) and protein (B) levels, during cell cycle phase progression for 0-24 h, following the cycle release. A. Quantitative RT-PCR. B. Western blotting. \*, p < 0.05.**

**Supplementary Fig. S6. Expression of cleaved caspase 3 at the IS between *FoxM1<sup>ΔΔ</sup>* vs. *FoxM1<sup>fl/fl</sup>* mice on D8. Immunofluorescence localization. DAPI was used for nuclear staining. le, luminal epithelium; ep, ectoplacental cone; dc, decidual cells;**

**Supplementary Table S1.** Sequence of primers used for qPCR analysis.

| Gene          | Forward primer          | Reverse primer           |
|---------------|-------------------------|--------------------------|
| <i>Foxm1</i>  | cacttgattgaggaccactt    | gtcgtttctgctgtgattcc     |
| <i>Rpl7</i>   | gcagatgtaccgcactgagattc | acctttgggcttactccattgata |
| <i>Bmp2</i>   | agatctgtaccgcaggcact    | aagttcctccacggcttctt     |
| <i>Hoxa10</i> | cgcttagagatcagccgtag    | tcaggaagcgaaaagacgtt     |
| <i>Ccnd3</i>  | cgagcctcacttccagtg      | agccagagggaagacatcct     |
| <i>Trp53</i>  | tggagactccagtgggaac     | tcttctgtacggcggctct      |
| <i>Tdo2</i>   | tgaaggcctggaagaagaa     | cgcttctcatcaacaagca      |
| <i>Ccna1</i>  | tcttcttcttgggtgctg      | acttctcctgattgcttgc      |
| <i>Ccna2</i>  | acagagctggcctgagtc      | ttgactgttgggcattgtt      |
| <i>Ccne1</i>  | cctccaaagtgcaccagtt     | caccctgtcgttgacatag      |
| <i>Ccne2</i>  | tctgtcattctagccatcg     | acaaaaggcaccatccagtc     |
| <i>E2f1</i>   | gaggctggatctggagactg    | gaagcgttgggtggtcagat     |
| <i>Cdk1</i>   | ctgggcactcctaacaacgaag  | tccaagccgttctcgtccag     |
| <i>Cdk2</i>   | cccagaacctgcttatcaa     | gcagcccagaagaatttcag     |
| <i>Cdk4</i>   | ggccctcaagagtgtgagag    | catcagccgtacaacattgg     |
| <i>Cdk6</i>   | agaagtctctgtccagcca     | cacgtctgaactccacgaa      |
| <i>Cdc25a</i> | gggaagcatcaggattgaa     | cacccttgatgtgacctct      |
| <i>Cdc25b</i> | tccttaccagtgaggctgct    | tcgtagcctgcttcagttt      |
| <i>Cks1b</i>  | gctggtacctgcttgettc     | cacgtcagcaaattcacacc     |
| <i>Gas1</i>   | accgattcattctgtgctc     | cagaatggtggcaggaaaat     |
| <i>Nek2</i>   | ccgagagcctgatgaagaac    | gggtgttctctttgcttcc      |
| <i>Aurkb</i>  | tcgctgttgttccctctct     | ggctccttccgtaggactct     |
| <i>Birc5</i>  | ctgatttggcccagtgttt     | caggggagtgttcttatgc      |
| <i>Plk1</i>   | gtgatggcacggagtcctat    | cagcaggtgctcactcatgt     |
| <i>Cenpf</i>  | cgtgaaagcgactcattgaa    | tgccagctcttggtttctt      |
| <i>Skp2</i>   | aactgcgcctatttcaccac    | gggcttttcagagtcagtc      |
| <i>Ccnb1</i>  | tggactacgacatggtgcat    | caggtgctgcataacaggaa     |
| <i>Ccnb2</i>  | accacagcctctgtgaaac     | cttgacagcagagcatcag      |
| <i>Cdkn1a</i> | gttcttgccacttcttac      | actgcttactgtcatcc        |
| <i>Cdkn1b</i> | agcgtttcttcttgcctgt     | cacaaaacatgccacttgg      |
| <i>Cdkn1c</i> | ggagcaggacgagaatcaag    | gttctcctgcgcagttct       |

**Supplementary Table S2.** Sequence of primers used for ChIP-PCR analysis of Hoxa10 binding on *FoxM1* gene.

| Primers pair | Forward primer       | Reverse primer       |
|--------------|----------------------|----------------------|
| 1            | tttctaccccgaccttacc  | tccagactaggettccctga |
| 2            | tgcagtaaatcatgcctcca | tccagaccaaccgaggatag |
| 3            | ctagctcttgaccccatcg  | atggctgccgagttttfaga |
| 4            | ctccccgtccttaaacttc  | taatccatgcaatccagca  |
| 5            | ttgaggcacagtgttacagc | gtgaccttctgctttctgc  |
| 6            | agctgggcacatcaccttag | aaataggcaaaggctgagca |
| 7            | cctgcctctgtctcatagc  | cgcagcctctgtgataact  |
| 8            | tggcaaacgtcaaaagagtg | gcctggctatgctaaagtgg |
| 9            | ctaacaggtggaggcaggag | ctgatggctcacagcaatgt |
| 10           | gctgcaactggtagctttcc | ggctgagacaaactgcatga |
